# Supplementary material for: Optimized Deep Brain Stimulation Surgery to Avoid Vascular Damage: A Single-Center Retrospective Analysis of Path Planning for Various Deep Targets by MRI Image Fusion
Source: MDPI journal article supplement (doi:10.3390/brainsci12080967), 2022-07-22
Supplement: s1 [file s1]

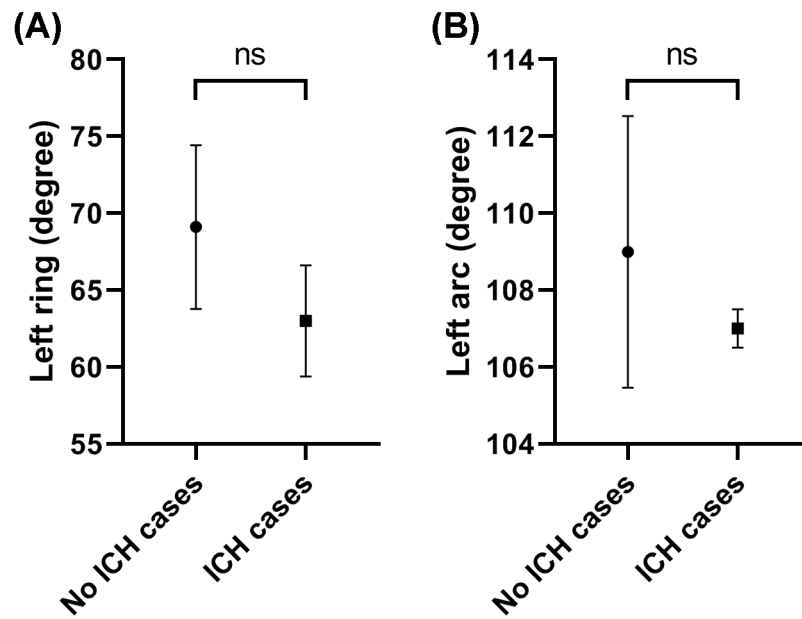

**Figure S1.** The comparisons of ring and arc angle values of the trajectories for STN lead placement between the no ICH cases and ICH cases (mean±SD). **(A)** Left ring:  $p = 0.0518$  (No ICH cases:  $69.11 \pm 5.33$ ; ICH cases:  $63 \pm 3.61$ ). **(B)** Left arc:  $p = 0.3324$  (No ICH cases:  $109.00 \pm 3.53$ ; ICH cases:  $107.00 \pm 0.50$ ). ns, no significant difference.
